# Supplementary material
Source: MDPI journal article supplement (https://www.mdpi.com/2311-5637/10/5/249)
Supplement: s1 [file s1]

Table S1. Brix of culture.

| Culture days | Monoculture |      |      | Median | Mean  | Standard error | Co-culture |      |      | Median | Mean  | Standard error |
|--------------|-------------|------|------|--------|-------|----------------|------------|------|------|--------|-------|----------------|
| 0            | 18.8        | 18.8 | 18.8 | 18.8   | 18.80 | 0.00           | 18.3       | 18.3 | 18.3 | 18.3   | 18.30 | 0.00           |
| 1            | 18.8        | 18.8 | 18.8 | 18.8   | 18.80 | 0.00           | 18.3       | 18.3 | 18.3 | 18.3   | 18.30 | 0.00           |
| 2            | 18          | 18.1 | 18.1 | 18.1   | 18.07 | 0.03           | 17.6       | 17.7 | 17.6 | 17.6   | 17.63 | 0.03           |
| 3            | 16.5        | 16.8 | 16.6 | 16.6   | 16.63 | 0.09           | 16.2       | 16.5 | 16.1 | 16.2   | 16.27 | 0.10           |
| 4            | 14.6        | 15.2 | 14.9 | 14.9   | 14.90 | 0.17           | 14.4       | 15   | 14.3 | 14.4   | 14.57 | 0.18           |
| 5            | 12.2        | 13.7 | 13.2 | 13.2   | 13.03 | 0.44           | 12.1       | 12.9 | 12.3 | 12.3   | 12.50 | 0.20           |
| 6            | 10.8        | 12.5 | 12   | 12     | 11.77 | 0.50           | 10.4       | 11.1 | 10.6 | 10.6   | 10.77 | 0.17           |
| 7            | 9.8         | 11.6 | 10.9 | 10.9   | 10.77 | 0.52           | 8.9        | 9.6  | 9.6  | 9.6    | 9.60  | 0.20           |

Table S2. More than 2-fold upregulated genes of sake yeast in co-culture with the *kuratsuki Kocuria*.

| Genbank ID     | Gene             | Product                   | Length<br>(nt) | Mapped reads |           | RPKM   |         | Ratio<br>Co/Mono | References          |
|----------------|------------------|---------------------------|----------------|--------------|-----------|--------|---------|------------------|---------------------|
|                |                  |                           |                | Monoculture  | Coculture | Mono   | Co      |                  |                     |
| NM_001184428.1 |                  | gag protein               | 1323           | 13           | 622       | 0.41   | 15.93   | 38.815           | [23][24][25]26][27] |
| NM_001184429.1 |                  | gag protein               | 1323           | 29           | 645       | 0.92   | 16.52   | 18.043           | [23][24][25]26][27] |
| NM_001184560.1 |                  | hypothetical<br>protein   | 150            | 34           | 352       | 9.47   | 79.52   | 8.399            |                     |
| NR_132263.1    |                  | SNR8                      | 190            | 3328         | 29766     | 731.62 | 5308.49 | 7.256            | [28]                |
| NM_001182398.1 |                  | gag protein               | 1323           | 44           | 361       | 1.39   | 9.25    | 6.656            | [23][24][25]26][27] |
| NM_001179028.4 |                  | gag-pol fusion<br>protein | 5269           | 87           | 699       | 0.69   | 4.50    | 6.518            | [23][24][25]26][27] |
| NM_001184636.1 |                  | hypothetical<br>protein   | 225            | 937          | 7299      | 173.94 | 1099.22 | 6.319            |                     |
| NM_001184412.1 |                  | gag protein               | 1323           | 57           | 380       | 1.80   | 9.73    | 5.408            | [23][24][25]26][27] |
| NM_001179946.1 | <i>PAU5</i>      | seripauperin<br>Pau5      | 369            | 27           | 172       | 3.06   | 15.79   | 5.168            | [43][44]            |
| NM_001179407.3 | <i>RGI2</i>      | Rgi2                      | 495            | 12           | 75        | 1.01   | 5.13    | 5.070            |                     |
| NM_001184516.1 | <i>SPO24</i>     | Spo24                     | 204            | 877          | 5083      | 179.57 | 844.29  | 4.702            | [66]                |
| NM_001179050.4 |                  | gag-pol fusion<br>protein | 5269           | 127          | 703       | 1.01   | 4.52    | 4.491            | [23][24][25]26][27] |
| NM_001184417.2 |                  | gag-pol fusion<br>protein | 5269           | 266          | 1453      | 2.11   | 9.34    | 4.431            | [23][24][25]26][27] |
| NM_001184632.3 | <i>YDR524W-A</i> | hypothetical<br>protein   | 90             | 10           | 48        | 4.64   | 18.07   | 3.894            |                     |
| NM_001183301.1 | <i>LDS2</i>      | Lds2                      | 1071           | 35           | 165       | 1.37   | 5.22    | 3.824            | [63][64]            |
| NM_001183307.1 | <i>DDR2</i>      | Ddr2                      | 186            | 102          | 455       | 22.91  | 82.89   | 3.619            | [34][35]            |

|                |                 |                                                                |      |      |       |         |         |       |                     |
|----------------|-----------------|----------------------------------------------------------------|------|------|-------|---------|---------|-------|---------------------|
| NM_001184392.2 |                 | gag-pol fusion protein                                         | 5269 | 22   | 98    | 0.17    | 0.63    | 3.614 | [23][24][25]26][27] |
| NM_001179315.1 | <i>SSP1</i>     | Ssp1                                                           | 1716 | 10   | 41    | 0.24    | 0.81    | 3.326 | [68]                |
| NM_001178270.1 | <i>PET9</i>     | ADP/ATP carrier protein Pet9                                   | 957  | 775  | 3158  | 33.83   | 111.82  | 3.306 | [98]                |
|                |                 | tRNA-Gln                                                       | 76   | 27   | 108   | 14.84   | 48.15   | 3.245 |                     |
|                | <i>15S_RRNA</i> | 15S ribosomal RNA                                              | 1649 | 3479 | 13740 | 88.12   | 282.34  | 3.204 |                     |
| NM_001181471.3 | <i>IRC18</i>    | Irc18                                                          | 675  | 20   | 78    | 1.24    | 3.92    | 3.164 | [63][64]            |
| NM_001183561.3 | <i>LSCI</i>     | succinate-CoA ligase (GDP-forming) subunit alpha               | 990  | 4449 | 17253 | 187.71  | 590.52  | 3.146 | [94]                |
| NM_001179729.1 | <i>PIR3</i>     | beta-1,3-glucan linked protein                                 | 978  | 5095 | 19346 | 217.60  | 670.28  | 3.080 |                     |
| NM_001180144.1 | <i>NDE2</i>     | NADH-ubiquinone reductase (H <sup>+</sup> -translocating) Nde2 | 1638 | 224  | 841   | 5.71    | 17.40   | 3.046 | [97]                |
| NM_001184424.1 |                 | gag protein                                                    | 1323 | 53   | 196   | 1.67    | 5.02    | 3.000 | [23][24][25]26][27] |
| NM_001181996.1 | <i>AHP1</i>     | thioredoxin peroxidase Ahp1                                    | 531  | 1796 | 6288  | 141.28  | 401.26  | 2.840 | [30]                |
| NM_001181753.1 | <i>SFC1</i>     | Sfc1                                                           | 969  | 180  | 611   | 7.76    | 21.37   | 2.754 | [99]                |
| NM_001181549.1 | <i>NCA3</i>     | SUN family protein Nca3                                        | 1014 | 285  | 948   | 11.74   | 31.68   | 2.698 | [96]                |
| NM_001183868.1 | <i>LEE1</i>     | Lee1                                                           | 906  | 96   | 317   | 4.43    | 11.86   | 2.679 |                     |
| NR_132265.1    |                 | snoRNA SNR5                                                    | 204  | 9020 | 28920 | 1846.85 | 4803.66 | 2.601 | [28]                |

|                |              |                                             |      |      |      |        |        |       |                    |
|----------------|--------------|---------------------------------------------|------|------|------|--------|--------|-------|--------------------|
| NM_001184127.1 | <i>CSR2</i>  | Csr2                                        | 3366 | 2040 | 6482 | 25.31  | 65.25  | 2.578 | [33]               |
|                | <i>HXT12</i> |                                             | 1374 | 25   | 79   | 0.76   | 1.95   | 2.564 |                    |
| NM_001179652.1 | <i>SRX1</i>  | sulfiredoxin                                | 384  | 74   | 233  | 8.05   | 20.56  | 2.554 | [47][50]           |
| NM_001179405.1 |              | hypothetical<br>protein                     | 1884 | 546  | 1714 | 12.11  | 30.83  | 2.547 |                    |
| NM_001181117.1 | <i>HFM1</i>  | Hfm1                                        | 3564 | 58   | 182  | 0.68   | 1.73   | 2.546 | [62]               |
| NM_001184137.1 | <i>TIP41</i> | Tip41                                       | 1071 | 358  | 1118 | 13.96  | 35.37  | 2.533 | [48][50]           |
|                |              | tRNA-Cys                                    | 76   | 11   | 34   | 6.05   | 15.16  | 2.507 |                    |
| NM_001179725.1 | <i>RCN1</i>  | Rcn1                                        | 636  | 102  | 314  | 6.70   | 16.73  | 2.497 | [49]               |
| NM_001184015.1 | <i>YIG1</i>  | Yig1                                        | 1386 | 77   | 234  | 2.32   | 5.72   | 2.465 | [140]              |
| NM_001181101.1 |              | hypothetical<br>protein                     | 537  | 27   | 82   | 2.10   | 5.17   | 2.464 |                    |
| NM_001181843.1 | <i>POM33</i> | nucleoporin<br>Pom33                        | 840  | 298  | 900  | 14.82  | 36.31  | 2.450 | [45][46][50]       |
| NM_001184420.1 |              | gag protein                                 | 1323 | 20   | 60   | 0.63   | 1.54   | 2.434 | [23][24][25]26[27] |
|                |              | tRNA-Lys                                    | 74   | 21   | 62   | 11.85  | 28.39  | 2.395 |                    |
| NM_001181372.1 | <i>MPC3</i>  | mitochondrial<br>pyruvate carrier           | 441  | 680  | 1972 | 64.41  | 151.52 | 2.353 | [41][42][50]       |
| NM_001181472.1 | <i>LOH1</i>  | Loh1                                        | 660  | 18   | 52   | 1.14   | 2.67   | 2.344 | [65]               |
| NM_001179913.1 | <i>AQY3</i>  | Aqy3                                        | 1941 | 1085 | 3134 | 23.35  | 54.71  | 2.343 | [141]              |
|                |              | tRNA-Leu                                    | 85   | 84   | 242  | 41.28  | 96.47  | 2.337 |                    |
| NM_001183870.1 | <i>LCL1</i>  | Lcl1                                        | 306  | 23   | 66   | 3.14   | 7.31   | 2.328 |                    |
| NM_001182787.1 | <i>CAT8</i>  | DNA-binding<br>transcription<br>factor Cat8 | 4302 | 870  | 2485 | 8.45   | 19.57  | 2.317 | [31][32][50]       |
| NM_001184175.1 |              | hypothetical<br>protein                     | 1119 | 74   | 211  | 2.76   | 6.39   | 2.313 |                    |
| NR_132211.1    |              | 5.8S ribosomal<br>RNA                       | 158  | 498  | 1414 | 131.65 | 303.25 | 2.303 |                    |

|                |               |                                                        |      |       |       |        |         |       |              |
|----------------|---------------|--------------------------------------------------------|------|-------|-------|--------|---------|-------|--------------|
| NM_001181931.1 | <i>PDC1</i>   | indolepyruvate<br>decarboxylase 1                      | 1692 | 32021 | 90465 | 790.48 | 1811.69 | 2.292 | [103]        |
| NM_001182181.1 | <i>GSP1</i>   | Ran GTPase<br>Gsp1                                     | 660  | 730   | 2047  | 46.20  | 105.09  | 2.275 | [72]         |
| NM_001184631.1 |               | hypothetical<br>protein                                | 201  | 3624  | 10137 | 753.09 | 1708.90 | 2.269 |              |
| NM_001182838.1 | <i>PAU19</i>  | seripauperin<br>Pau19                                  | 375  | 25    | 69    | 2.78   | 6.23    | 2.239 | [43]         |
| NM_001183409.1 | <i>HXT11</i>  | hexose<br>transporter Hxt11                            | 1704 | 66    | 182   | 1.62   | 3.62    | 2.237 | [89]         |
| NM_001181342.1 | <i>RTA1</i>   | Rta1                                                   | 954  | 15    | 41    | 0.66   | 1.46    | 2.217 | [142]        |
| NM_001182026.1 | <i>SLS1</i>   | Sls1                                                   | 1932 | 74    | 201   | 1.60   | 3.53    | 2.204 | [100]        |
| NM_001179454.1 | <i>MOB1</i>   | Mob1                                                   | 945  | 849   | 2282  | 37.53  | 81.83   | 2.181 | [39][40][50] |
| NM_001178185.1 | <i>CLN3</i>   | cyclin Cln3                                            | 1743 | 170   | 455   | 4.07   | 8.85    | 2.171 | [71][75][76] |
| NM_001178718.1 | <i>CIT2</i>   | citrate (Si)-<br>synthase Cit2                         | 1383 | 8469  | 22252 | 255.78 | 545.19  | 2.132 | [93]         |
| NM_001181592.1 | <i>HSP150</i> | heat shock<br>protein Hsp150                           | 1242 | 7217  | 18840 | 242.71 | 514.00  | 2.118 | [37][38]     |
| NM_001181736.3 | <i>BNA2</i>   | dioxygenase<br>Bna2                                    | 1362 | 482   | 1258  | 14.78  | 31.30   | 2.117 |              |
| NM_001180555.1 | <i>VHS1</i>   | putative<br>serine/threonine<br>protein kinase<br>Vhs1 | 1386 | 762   | 1986  | 22.96  | 48.55   | 2.114 | [73]         |
| NM_001181080.1 | <i>CLG1</i>   | Clg1                                                   | 1359 | 5439  | 14119 | 167.17 | 352.04  | 2.106 | [69][70]     |
| NM_001178711.1 | <i>GEX1</i>   | glutathione<br>exchanger                               | 1848 | 25    | 64    | 0.57   | 1.17    | 2.077 | [36]         |
| NM_001183040.1 | <i>SPS19</i>  | Sps19                                                  | 879  | 200   | 511   | 9.50   | 19.70   | 2.073 | [67]         |

|                |              |                                                |      |      |      |       |       |       |      |
|----------------|--------------|------------------------------------------------|------|------|------|-------|-------|-------|------|
| NM_001182899.3 | <i>NOP2</i>  | rRNA (cytosine-<br>C5-)-<br>methyltransferase  | 1857 | 1001 | 2545 | 22.52 | 46.44 | 2.063 | [29] |
| NM_001179865.1 |              | Nop2<br>hypothetical<br>protein                | 924  | 572  | 1435 | 25.86 | 52.62 | 2.035 |      |
| NM_001182327.1 | <i>MRPL4</i> | mitochondrial<br>54S ribosomal<br>protein YmL4 | 960  | 64   | 160  | 2.78  | 5.65  | 2.028 | [95] |

Table S3. Less than 0.5-fold downregulated genes of sake yeast in co-culture with the *kuratsuki Kocuria*.

| Genbank ID     | Gene        | Product                                                            | Length<br>(nt) | Mapped reads |           | RPKM    |        | Ratio<br>Co/Mono | References          |
|----------------|-------------|--------------------------------------------------------------------|----------------|--------------|-----------|---------|--------|------------------|---------------------|
|                |             |                                                                    |                | Monoculture  | Coculture | Mono    | Co     |                  |                     |
| NM_001179350.3 |             | hypothetical protein                                               | 1875           | 150          | 13        | 3.34    | 0.23   | 0.070            |                     |
| NM_001182870.1 | <i>HHT2</i> | histone H3                                                         | 411            | 36894        | 4354      | 3749.46 | 358.96 | 0.096            |                     |
| NM_001184393.1 |             | gag protein                                                        | 1323           | 168          | 25        | 5.30    | 0.64   | 0.121            | [23][24][25]26][27] |
| NM_001178994.3 | <i>SSA4</i> | Hsp70 family chaperone Ssa4                                        | 1929           | 14393        | 2257      | 311.65  | 39.65  | 0.127            | [57][60]            |
| NM_001184395.1 |             | gag protein                                                        | 1323           | 146          | 23        | 4.61    | 0.59   | 0.128            | [23][24][25]26][27] |
| NM_001179244.1 | <i>BZZ1</i> | Bzz1                                                               | 1902           | 922          | 151       | 20.25   | 2.69   | 0.133            | [143]               |
| NM_001178706.1 | <i>CHAI</i> | L-serine/L-threonine ammonia-lyase<br>Chal                         | 1083           | 5808         | 1196      | 224.00  | 37.42  | 0.167            | [78]                |
| NM_001181321.3 | <i>TDH3</i> | glyceraldehyde-3-phosphate dehydrogenase (phosphorylating)<br>Tdh3 | 999            | 4822         | 1273      | 201.61  | 43.18  | 0.214            | [86][87]            |
| NM_001183303.1 | <i>GSH2</i> | glutathione synthase                                               | 1476           | 2088         | 556       | 59.09   | 12.76  | 0.216            | [56][57]            |
| NM_001184399.1 |             | gag protein                                                        | 1323           | 448          | 137       | 14.14   | 3.51   | 0.248            | [23][24][25]26][27] |
| NM_001181666.1 | <i>TDH2</i> | glyceraldehyde-3-phosphate dehydrogenase (phosphorylating)<br>Tdh2 | 999            | 17009        | 5428      | 711.16  | 184.11 | 0.259            | [86][87]            |

|                |              |                                                           |      |      |      |        |       |       |                     |
|----------------|--------------|-----------------------------------------------------------|------|------|------|--------|-------|-------|---------------------|
| NM_001184291.1 | <i>OPT2</i>  | Opt2                                                      | 2634 | 1913 | 726  | 30.34  | 9.34  | 0.308 | [91]                |
| NM_001184408.2 |              | gag-pol fusion protein                                    | 5269 | 683  | 261  | 5.41   | 1.68  | 0.310 | [23][24][25]26][27] |
| NM_001182279.3 | <i>ECM19</i> | Ecm19                                                     | 339  | 232  | 95   | 28.59  | 9.50  | 0.332 |                     |
| NM_001182486.1 | <i>PHO84</i> | phosphate transporter Pho84                               | 1764 | 194  | 80   | 4.59   | 1.54  | 0.335 | [92]                |
| NM_001184433.1 |              | gag protein                                               | 1323 | 633  | 268  | 19.98  | 6.86  | 0.343 | [23][24][25]26][27] |
| NM_001182001.1 | <i>AVL9</i>  | Avl9                                                      | 2295 | 4285 | 1834 | 77.99  | 27.08 | 0.347 | [144]               |
| NM_001178757.1 |              | hypothetical protein                                      | 384  | 504  | 225  | 54.82  | 19.85 | 0.362 |                     |
| NM_001180959.1 | <i>PAN2</i>  | poly(A)-specific ribonuclease                             | 3348 | 7651 | 3512 | 95.45  | 35.54 | 0.372 |                     |
| NM_001182742.1 | <i>RNAI</i>  | GTPase-activating protein Rna1                            | 1224 | 2262 | 1045 | 77.19  | 28.93 | 0.375 |                     |
| NM_001181854.1 | <i>RIX7</i>  | putative AAA family ATPase Rix7                           | 2514 | 1830 | 848  | 30.40  | 11.43 | 0.376 |                     |
| NM_001180096.1 | <i>BSC1</i>  | Bsc1                                                      | 987  | 45   | 21   | 1.90   | 0.72  | 0.379 |                     |
| NM_001180854.3 | <i>SOM1</i>  | Som1                                                      | 225  | 107  | 51   | 19.86  | 7.68  | 0.387 | [101]               |
| NM_001182472.1 | <i>COQ5</i>  | 2-hexaprenyl-6-methoxy-1,4-benzoquinone methyltransferase | 924  | 3075 | 1473 | 139.00 | 54.02 | 0.389 | [79]                |
| NM_001348877.1 |              | hypothetical protein                                      | 336  | 52   | 25   | 6.46   | 2.52  | 0.390 |                     |
| NM_001184586.1 |              | hypothetical protein                                      | 195  | 521  | 251  | 111.60 | 43.62 | 0.391 |                     |



|                |              |                                             |      |       |       |        |        |       |          |
|----------------|--------------|---------------------------------------------|------|-------|-------|--------|--------|-------|----------|
| NM_001182770.1 | <i>SAP30</i> | Sap30                                       | 606  | 467   | 230   | 32.19  | 12.86  | 0.400 | [53]     |
| NM_001179305.1 | <i>ENO2</i>  | phosphopyruvate<br>hydratase Eno2           | 1314 | 22862 | 11406 | 726.73 | 294.13 | 0.405 | [82]     |
| NM_001178735.1 | <i>HSP30</i> | Hsp30                                       | 999  | 2622  | 1332  | 109.63 | 45.18  | 0.412 | [58][59] |
| NM_001181844.1 | <i>SSA2</i>  | Hsp70 family<br>chaperone Ssa2              | 1920 | 33734 | 17185 | 733.87 | 303.29 | 0.413 | [57][60] |
| NM_001348822.1 |              | hypothetical<br>protein                     | 408  | 99    | 51    | 10.14  | 4.24   | 0.418 |          |
| NM_001179539.3 | <i>MET28</i> | Met28                                       | 564  | 2863  | 1499  | 212.03 | 90.06  | 0.425 | [85]     |
| NM_001182754.1 | <i>FAA4</i>  | long-chain fatty<br>acid-CoA ligase<br>Faa4 | 2085 | 30530 | 15998 | 611.61 | 259.99 | 0.425 | [83]     |
| NM_001182301.1 | <i>INA1</i>  | Ina1                                        | 2028 | 1868  | 979   | 38.47  | 16.36  | 0.425 |          |
| NM_001183408.1 | <i>HPF1</i>  | mannoprotein                                | 2904 | 557   | 298   | 8.01   | 3.48   | 0.434 |          |
| NM_001181273.1 | <i>THI4</i>  | thiamine thiazole<br>synthase               | 981  | 8158  | 4499  | 347.35 | 155.40 | 0.447 | [88]     |
| NM_001182423.1 | <i>TEM1</i>  | Ras family<br>GTPase Tem1                   | 738  | 335   | 185   | 18.96  | 8.49   | 0.448 | [74]     |
| NM_001346794.1 |              | hypothetical<br>protein                     | 309  | 27    | 15    | 3.65   | 1.64   | 0.451 |          |
| NM_001182299.3 | <i>CTR3</i>  | high-affinity Cu<br>transporter Ctr3        | 726  | 665   | 373   | 38.26  | 17.41  | 0.455 | [90]     |
| NM_001270754.1 |              | hypothetical<br>protein                     | 354  | 235   | 132   | 27.73  | 12.63  | 0.456 |          |
| NM_001181629.1 | <i>ELO1</i>  | fatty acid<br>elongase Elo1                 | 933  | 5804  | 3330  | 259.84 | 120.94 | 0.465 | [81]     |

|                |              |                                                                                                 |      |        |        |         |         |       |          |
|----------------|--------------|-------------------------------------------------------------------------------------------------|------|--------|--------|---------|---------|-------|----------|
| NM_001181485.3 | <i>TDHI</i>  | glyceraldehyde-3-phosphate dehydrogenase (phosphorylating) Tdh1 transcription initiation factor | 999  | 232778 | 134242 | 9732.65 | 4553.31 | 0.468 | [86][87] |
| NM_001183613.1 | <i>TOAI</i>  | IIA large subunit                                                                               | 861  | 1458   | 846    | 70.73   | 33.29   | 0.471 |          |
| NM_001181363.1 | <i>YHBI</i>  | flavo-hemoglobin                                                                                | 1200 | 4260   | 2476   | 148.28  | 69.92   | 0.472 | [61]     |
| NM_001180491.3 | <i>PLP1</i>  | Plp1                                                                                            | 693  | 270    | 158    | 16.27   | 7.73    | 0.475 | [145]    |
| NM_001181110.1 | <i>RTF1</i>  | Rtf1                                                                                            | 1677 | 1390   | 815    | 34.62   | 16.47   | 0.476 | [52]     |
| NM_001179554.1 | <i>DAL3</i>  | ureidoglycolate hydrolase protein                                                               | 588  | 1168   | 692    | 82.97   | 39.88   | 0.481 | [80]     |
| NM_001183877.1 | <i>TIM50</i> | translocase subunit Tim50                                                                       | 1431 | 942    | 561    | 27.50   | 13.28   | 0.483 | [102]    |
| NM_001184257.1 | <i>GPH1</i>  | glycogen phosphorylase                                                                          | 2709 | 25020  | 14950  | 385.77  | 187.00  | 0.485 | [84]     |
| NM_001184242.1 | <i>ASN1</i>  | asparagine synthase (glutamine-hydrolyzing) 1                                                   | 1719 | 16038  | 9586   | 389.70  | 188.96  | 0.485 | [77]     |
| NM_001179432.1 | <i>SDS3</i>  | Sds3                                                                                            | 984  | 1997   | 1194   | 84.77   | 41.12   | 0.485 | [54]     |
| NM_001178954.1 | <i>THO1</i>  | Tho1                                                                                            | 657  | 1037   | 623    | 65.93   | 32.13   | 0.487 | [146]    |
| NM_001182905.1 | <i>RPL9B</i> | ribosomal 60S subunit protein L9B                                                               | 576  | 1758   | 1057   | 127.48  | 62.18   | 0.488 |          |
| NM_001182949.3 | <i>CYB5</i>  | Cyb5                                                                                            | 363  | 1635   | 987    | 188.13  | 92.13   | 0.490 | [147]    |

|                |             |                                                                           |      |      |      |        |        |       |      |
|----------------|-------------|---------------------------------------------------------------------------|------|------|------|--------|--------|-------|------|
| NM_001184190.1 | <i>ASR1</i> | ubiquitin-protein<br>ligase Asr1                                          | 867  | 478  | 289  | 23.03  | 11.29  | 0.490 | [55] |
| NM_001179122.1 |             | hypothetical<br>protein<br>carbonyl<br>reductase<br>(NADPH-<br>dependent) | 453  | 2315 | 1407 | 213.46 | 105.24 | 0.493 |      |
| NM_001180904.1 |             | peptidylprolyl<br>isomerase Cpr6                                          | 1116 | 6246 | 3814 | 233.77 | 115.80 | 0.495 |      |
| NM_001184662.3 |             | hypothetical<br>protein                                                   | 258  | 31   | 19   | 5.02   | 2.50   | 0.497 |      |
| NM_001179829.3 | <i>GAP1</i> | amino acid<br>permease Gap1                                               | 1809 | 9237 | 5673 | 213.28 | 106.26 | 0.498 |      |

## References

- [140] Granath, K.; Modig, T.; Forsmark, A.; Adler, L.; Lidén, G. The *YIG1* (*YPL201c*) encoded protein is involved in regulating anaerobic glycerol metabolism in *Saccharomyces cerevisiae*. *Yeast* **2005**, *22*, 1257-1268.
- [141] Salas-Navarrete, P.C.; Rosas-Santiago, P.; Suárez-Rodríguez, R.; Martínez, A.; Caspeta, L. Adaptive responses of yeast strains tolerant to acidic pH, acetate, and supraoptimal temperature. *Appl. Microbiol. Biotechnol.* **2023**, *107*, 4051-4068.
- [142] Soustre, I.; Letourneux, Y.; Karst, F. Characterization of the *Saccharomyces cerevisiae* *RTA1* gene involved in 7-amincholesterol resistance. *Curr. Genet.* **1996**, *30*, 121-125.
- [143] Soulard, A.; Lechler, T.; Spiridonov, V.; Shevchenko, A.; Shevchenko, A.; Li, R.; Winsor, B. *Saccharomyces cerevisiae* Bzz1p is implicated with type I myosins in actin patch polarization and is able to recruit actin-polymerizing machinery *in vitro*. *Mol. Cell. Biol.* **2002**, *22*, 7889-7906.
- [144] Harsay, E.; Schekman, R. Avl9p, a member of a novel protein superfamily, functions in the late secretory pathway. *Mol. Biol. Cell* **2007**, *18*, 1203-1219.
- [145] Flanary, P.L.; DiBello, P.R.; Estrada, P.; Dohlman, H.G. Functional analysis of Plp1 and Plp2, two homologues of phosducin in yeast. *J. Biol. Chem.* **2000**, *275*, 18462-18469.
- [146] Jimeno, S.; Luna, R.; García-Rubio, M.; Aguilera, A. Tho1, a novel hnRNP, and Sub2 provide alternative pathways for mRNP biogenesis in yeast THO mutants. *Mol. Cell. Biol.* **2006**, *26*, 4387-4398.
- [147] Truan, G.; Epinat, J.C.; Rougeulle, C.; Cullin, C.; Pompon, D. Cloning and characterization of a yeast cytochrome b5-encoding gene which suppresses ketoconazole hypersensitivity in a NADPH-P-450 reductase-deficient strain. *Gene* **1994**, *142*, 123-127.
