# Supplementary material
Source: MDPI journal article supplement (https://www.mdpi.com/2311-5637/10/5/249)
Supplement: s1 [file s1]

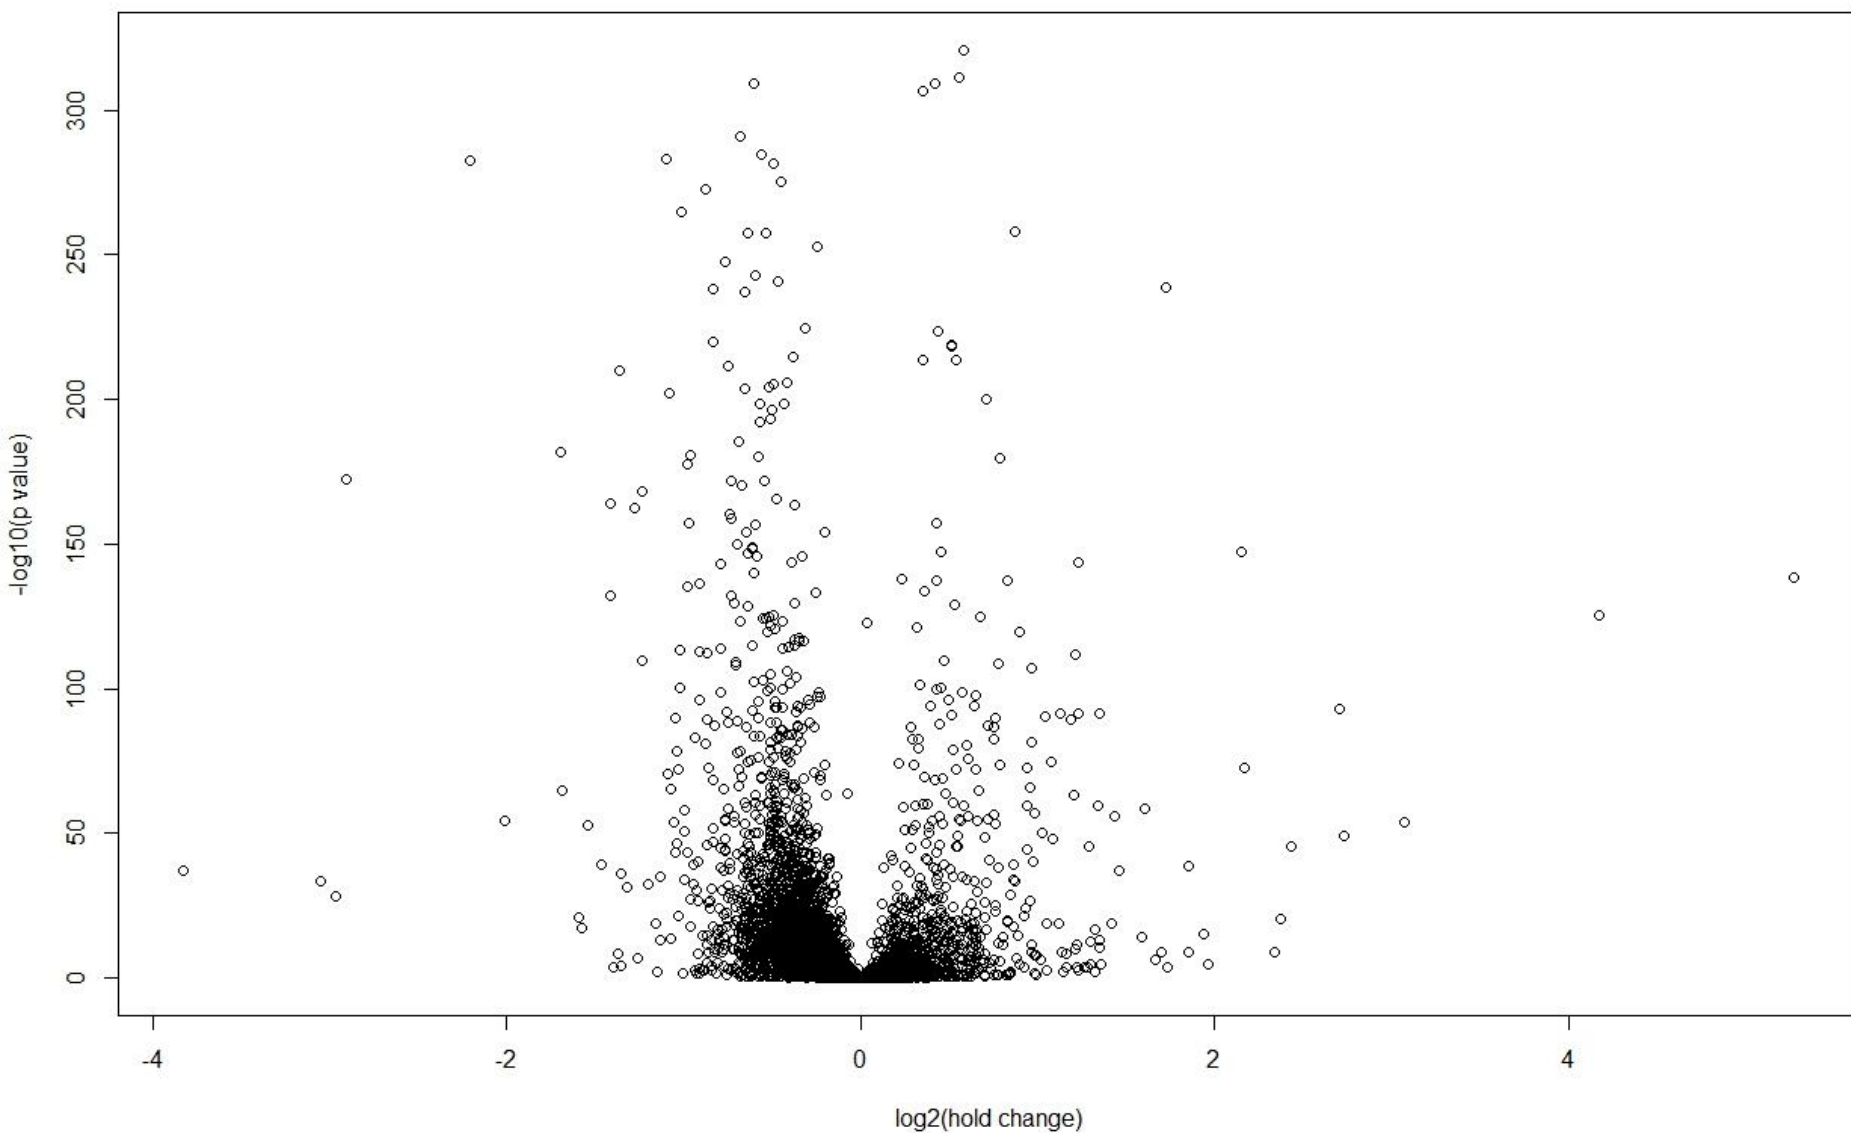

Fig. S1. Volcano plot between hold change and  $p$  value. X-axis,  $\log_2(\text{hold change})$ . Y-axis,  $-\log_{10}(p \text{ value})$ .
